# Supplementary material for: Asymmetric synthesis in a Norrish type II cleavage reaction induced by crystal chirality
Source: Royal Society of Chemistry journal article supplement (doi:10.1039/b309256a), 2003-11-01
Supplement: b309256a.doc [file b309256a.doc]

Supporting Information for Photochemical and Photobiological Sciences

Asymmetric Synthesis in a Norrish Type II/Cleavage Induced by Crystal Chirality

André B. Charette, Kenneth C.W. Chong, Jean-François Fournier,Brian Patrick,and John R. Scheffer*

The University of British Columbia, Vancouver, BC, Canada.

# **S.1 Experimental procedures**

# **General Consideration**

**1H and 13C NMR Spectra** were recorded in deuterated solvents as denoted. The spectrometers used were a Bruker AV 300 and a Bruker AV400. Signal positions are given in parts per million (ppm) with the solvent signal as the internal reference. The proton NMR spectra were either recorded at 300 mHz or at 400 mHz. The multiplicities of the signals have been abbreviated as follows: s = singlet, d = doublet, t = triplet, q = quartet, m = multiplet. All carbon NMR spectra were recorded at 75 or 100 mHz. All spectra were run under broad band 13C-{H} decoupling. **High Resolution Mass Spectra (HRMS)** were recorded on a Kratos MS 50 instrument using chemical ionization (CI) with the ionizing gas noted, or a Bruker Esquire LC mass spectrometer using electrospray ionization (ESI). The masses of some organic salts were determined on a Kratos IIHQ hybrid mass spectrometer by recording liquid secondary ionization mass spectra (LSIMS). Molecular ions are designated as M++1 or M++23Na. **Infrared Spectra (IR)** were recorded on a Perkin Elmer 1710 Fourier transform spectrometer. **Melting points** were determined on a Fisher-Johns hot stage apparatus and are uncorrected. **Elemental Analyses** were performed by the UBC microanalytical laboratory. **High Pressure Liquid Chromatography (HPLC)** analyses were performed on a Waters 600E system coupled to a tunable UV absorbance detector (Waters 486). The Chiralcel OD column (250 mm  4.6 mm ID) employed was obtained from Chiral Technologies Incorporated.

**Synthesis of Acid 1a**[[1]](#footnote-2)

# Scheme E1

Zn complex **ii**

To a solution of iodine (2.87 g, 11.3 mmol) in 10 mL of CH2Cl2 at 0 °C was added ether (2.34 mL, 22.6 mmol) then diethyl zinc (1.16 mL, 11.3 mmol) slowly. The ice bath was removed and the reaction mixture stirred for 10 min before being used. This solution was added to a solution of dibenzyl ether **i**[[2]](#footnote-3)(1.00 g, 3.75 mmol) in dry CH2Cl2 (8 mL) at 0 °C. To this was added a solution of iodoform (2.21 g, 5.62 mmol, Aldrich) in 25 mL of CH2Cl2 by cannula. The ice bath was removed and the reaction mixture was stirred until TLC analysis showed the complete consumption of starting material.

*Acid* **1a**

A solution of compound **ii** in CH2Cl2 was evaporated to dryness under vacuum and THF (10 mL) was added to the residue. This solution was cooled to -78 °C and freshly prepared CuCN·2LiCl (CuCN: 1.01 g, 11.3 mmol, Aldrich; LiCl: 0.953 g, 22.5 mmol, Aldrich) in THF (35 mL) at -30 °C was added by cannula. The resulting mixture was allowed to slowly warm to 0 °C over 2 h, and cooled back to –78 °C. To this was added a solution of terephthaloyl chloride (3.81 g, 18.8 mmol, 5.0 eq.) in THF (60 mL, slowly cool the solution to –78 °C while adding) by cannula. The reaction was allowed to warm to room temperature slowly over 3 h. The reaction vessel was then cooled back to 0 °C, and water was added. The ice bath was then removed and the reaction was stirred for 30 min. The resulting biphasic solution was filtered on a silica gel and eluted with 50% EtOAc/hexanes. The filtrate was concentrated and the residue was chromatographed on silica gel and eluted with 10-50 % ethyl acetate/Pet ether. The solvent was removed *in* *vacuo*. Recrystallization from EtOAc/pet ether gave 571 mg (35%) of fine white needles.

**mp** 130-132 C

**1H NMR** (400 mHz, CD2­Cl2): 1.98 (2H, m), 2.80 (1H, t, *J* = 8.4 Hz), 3.72 (2H, m), 3.88 (2H, m), 4.40 (4H, s), 7.08-7.17 (10 H, m), 7.89 (2H, d *J* = 8.2 Hz), 7.99 (2H, d, *J* = 8.2 Hz)

**13C** **NMR** (75 mHz, CD2Cl2): 198.67, 170.32, 143.78, 139.01, 132.92, 130.66, 128.74, 128.46, 128.20, 128.01, 73.40, 65.04, 27.55, 25.72

**IR** (KBr pellet): 2859, 1686, 1664, 1411, 1288, 1212, 1114, 1006, 730, 696 cm-1

**LRMS** (ESI) m/z (M++1): 431, 323

**HRMS** (ESI) m/z (M++1): Calculated mass for C27H27NO5 = 431.1859, found: 431.1857

**Anal. Calcd.**: C, 75.33, H, 6.09. Found: C, 75.48, H, 6.24.

*Ester* **1b**

A solution of acid **1a** (150 mg, 0.35 mmol) in 10 mL methanol was treated with ethereal diazomethane until a permanent yellow colour was observed. The solution was concentrated *in* *vacuo* and the resulting residue was purified by radial chromatography (35 % ether/pet ether). Recrystallization from hexanes afforded 118 mg (76%) fine needles.

**mp** 67-68 C

**1H** **NMR** (300 mHz, CD3­CN): 1.90 (2H, m), 2.96 (1H, t, *J* = 8.6 Hz), 3.77 (2H, m), 3.89 (5H, m), 4.40 (4H, dd, *J* = 11.8 Hz, 16.5 Hz), 7.16-7.26 (10 H, m), 7.98-8.06 (4H, dd *J* = 8.7 Hz, 16.1 Hz)

**13C** **NMR** (75 mHz, CD3CN): 199.11, 167.02, 143.45, 139.78, 134.43, 130.30, 129.24, 129.00, 128.51, 128.28, 73.31, 73.14, 65.25, 53.03, 27.64, 25.89

**IR** (KBr pellet): 2863, 1718, 1663, 1279, 1110, 1010, 728, 698 cm-1

**LRMS** (ESI) m/z (M++1): 445, 337

**HRMS** (ESI) m/z (M++1): Calculated mass for C28H29O5 = 445.2015, found: 445.2011.

**Anal. Calcd.**: C, 75.65, H, 6.35. Found: C, 75.71, H, 6.42

This structure was confirmed by X-ray crystallographic analysis:

| Habit | colourless platelet |
| --- | --- |
| Space group | *P*21/n |
| *a*, Å | 17.271(2) |
| *b*, Å | 5.7140(5) |
| *c,* Å | 23.476(3) |
|  () | 90 |
| () | 98.234(5) |
| () | 90 |
| Z | 4 |
| R | 0.062 |

*General procedure for the preparation of salts* **1c**-**1h**.

To a solution of 0.16 mmol of an optically pure amine in 2 mL of diethyl ether was added a solution of 69 mg (0.16 mmol) of acid **1a** in 2 mL of methanol. For Salt **1c**-**1g**, **t**he solvent was removed *in* *vacuo* and the white residue was collected by suction filtration and washed with ether. Recrystallization from an appropriate solvent gave the final product. For salt **1h**, removal of solvent afforded a sticky oil. Triturating from pet ether afforded the desired product

*Data for salts* **1c**-**1h**

*Salt* **1c**

**mp** 126-128 C (methanol)

**1H** **NMR** (300 mHz, CD3­OD)  1.58-1.60 (3H, d, *J* = 7.0 Hz), 2.02 (2H, m), 3.04 (1H, t, *J* = 8.6 Hz), 3.80-3.94 (4H, m), 4.40 (5H, m), 7.18-7.42 (15 H, m), 7.96-7.98 (4H, dd *J* = 8.3, 19.0 Hz)

**13C NMR** (75 mHz, CD3OD)  200.56, 174.02, 141.78, 140.33, 139.62, 130.31, 130.12, 129.34, 128.87, 128.67, 128.62, 127.56, 73.91, 65.72, 52.33, 27.67, 26.00, 21.04

**IR** (KBr pellet): 2853, 1665, 1586, 1396, 1076, 736, 699 cm-1

**LRMS** (LSIMS) m/z (M++1): 552, 453, 323, 122, 105, 91.

**HRMS** (LSIMS) m/z (M++1): Calculated mass for C35H38NO5 = 552.27500, found: 552.27488.

**Anal. Calcd.**: C, 76.20, H, 6.76, N, 2.54. Found: C, 76.18, H, 6.84, N, 2.44

*Salt* **1d**

**mp** 139-141 C (acetonitrile)

**1H** **NMR** (400 mHz, CD3­OD)  2.05 (2H, m), 2.90-3.10 (2H, m), 3.21 (1H, m), 3.76 (2H, m), 3.93 (2H, m). 4.40 (4H, s), 4.52 (1H, d *J* = 5.8 Hz), 4.68 (1H, m), 7.15-7.46 (15H, m), 7.92-8.05 (4H, dd *J* = 11.2 Hz, *J* = 8.4 Hz).

**13C** **NMR** (75 mHz, CD3OD)  200.62, 174.51, 142.76, 141.92, 139.63, 130.81, 130.30, 129.27, 128.85, 128.70, 128.69, 128.42, 126.67, 126.11, 73.91, 72.08, 65.74, 58.75, 40.12, 27.67, 26.07

**IR** (KBr pellet): 3410, 2857, 1665, 1585, 1542, 1389, 1209, 1075, 739, 697 cm-1

**LRMS** (ESI) m/z (M++1): 580, 453, 323, 150.

**HRMS** (ESI) m/z (M++1): Calculated mass for C36H48NO6 = 580.2699, found: 580.2712

**Anal. Calcd.**: C, 74.59, H, 6.43, N, 2.42. Found: C, 74.65, H, 6.61, N, 2.39

*Salt* **1e**

**mp** 130-132 C (methanol)

**1H** **NMR** (400 mHz, CD3­OD)  1.02-1.38 (8H, m), 1.52 (1H, m), 1.72-1.88 (5H, m), 2.09 (2H, m), 3.02-3.08 (2H, m), 3.78-3.99 (4H, m), 4.41 (4H, s), 7.12-7.35 (10 H, m), 7.96-8.03 (4H, dd, *J* = 8.5 Hz, 10 Hz)

**13C** **NMR** (75 mHz, CD3OD)  200.62, 174.13, 143.04, 141.74, 139.64, 130.24, 129.31, 128.89, 128.70, 128.62, 73.91, 65.78, 53.42, 42.78, 30.02, 28.85, 27.67, 27.10, 27.02, 26.95, 26.04, 16.07

**IR** (KBr pellet): 2922, 1664, 1585, 1539, 1372, 1095, 732 cm-1

**LRMS** (LSIMS) m/z (M++1): 558, 453, 323, 128, 91

**HRMS** (LSIMS) m/z (M++1): Calculated mass for C35H44NO5 = 558.32195, found: 558.32209.

**Anal. Calcd.**: C, 75.37, H, 7.77, N, 2.51. Found: C, 74.98, H, 7.62, N, 2.48

*Salt* **1f**

**mp** 122-124 C (acetonitrile/methanol)

**1H** **NMR** (400 mHz, CD3­OD)  1.03 (3H, d, *J* = 6.8 Hz), 2.05 (2H, m), 3.07 (1H, t, *J* = 8.6 Hz), 3.46 (1H, m), 3.78-3.96 (4H, m), 4.42 (4H, s), 4.91 (1H, d, *J* = 6.2 Hz), 7.17-7.39 (15 H, m), 7.95 (4H, dd, *J* = 8.5 Hz, *J* = 17.0 Hz))

**13C** **NMR** (75 mHz, CD3OD)  207.65, 178.41, 151.38, 149.00, 148.01, 138.50, 137.56, 137.50, 136.80, 136.75, 136.48, 135.44, 81.47, 81.23, 73.53, 61.30, 35.47, 33.77, 21.93.

**IR** (KBr pellet): 3609, 2873, 1663, 1625, 1532, 1374, 1090, 1052, 748, 730 cm-1

**LRMS** (LSIMS) m/z (M++1): 582, 323, 152, 134, 91.

**HRMS** (LSIMS) m/z (M++1): Calculated mass for C36H40NO6 = 582.28556, found: 582.28543.

**Anal. Calcd.**: C, 74.33, H, 6.76, N, 2.41. Found: C, 74.09, H, 6.70 N, 2.38

*Salt* **1g**

**mp** 122-124 C (acetonitrile/methanol)

**1H NMR** (400 mHz, CD3­OD)  1.03 (3H, d, *J* = 6.8 Hz), 2.05 (2H, m), 3.07 (1H, t, *J* = 8.6 Hz), 3.46 (1H, m), 3.78-3.96 (4H, m), 4.42 (4H, s), 4.91 (1H, d, *J* = 6.2 Hz), 7.17-7.39 (15 H, m), 7.95 (4H, dd, *J* = 8.5 Hz, *J* = 17.0 Hz)

**13C NMR** (75 mHz, CD3OD)  207.65, 178.41, 151.38, 149.00, 148.01, 138.50, 137.56, 137.50, 136.80, 136.75, 136.48, 135.44, 81.47, 81.23, 73.53, 61.30, 35.47, 33.77, 21.93.

**IR** (KBr pellet): 3609, 2873, 1663, 1625, 1532, 1374, 1090, 1052, 748, 730 cm-1

**LRMS** (LSIMS) m/z (M++1): 582, 323, 152, 134, 91.

**Anal. Calcd.**: C, 74.33, H, 6.76, N, 2.41. Found: C, 74.20, H, 6.82 N, 2.48

*Salt* **1h**

**mp**  114-116C (triturated from pet ether)

**1H** **NMR** (300 mHz, CD3­OD)  1.96-2.06 (5H, m), 2.36 (1H, m), 3.00 (1H, t *J* = 8.6 Hz), 3.10-3.24 (2H, m), 3.76-3.97 (4H, m), 4.16 (1H, m), 4.40 (4H, s), 7.15-7.24 (10H, m), 7.93-8.01 (4H, dd, 8.5 Hz, 17.0 Hz)

**13C** **NMR** (75 mHz, CD3OD)  200.54, 174.52, 168.58, 142.00, 139.61, 130.30, 129.28, 128.86, 128.75, 128.61, 73.89, 65.71, 60.95, 47.34, 31.27, 27.68, 26.03, 25.42.

**IR** (KBr pellet): 3320, 2939, 1673, 1594, 1554, 1372, 1211, 1074, 734, 698 cm-1

**LRMS** (LSIMS) m/z (M++1): 545, 323, 122, 105, 91.

**HRMS** (LSIMS) m/z (M++1): Calculated mass for C32H37N2O6 = 545.26520, found: 545.26516.

**Anal. Calcd.**: C, 70.57, H, 6.66, N, 5.14. Found: C, 70.19, H, 6.84, N, 5.44

### S.2 Preparative photolysis of compound 1b

A solution of ester **1b** (33 mg, 0.07 mmol) in acetonitrile (10 mL) was irradiated (Pyrex filter, 450 W Hanovia lamp) for 75 min at room temperature. The solvent was removed *in vacuo* and the residue chromatographed (Chromatotron, 20 % Et2O in petroleum ether) to afford a mixture of compounds **4** and **5** (23 mg, 70 %), and a trace amount of side product. NMR spectroscopy and GC analysis revealed a ratio of 1:3 for compounds **4**:**5**. The isolation of pure isomers **4** and **5** was difficult. Repeated attempts at purification by preparative HPLC (3 % ethyl acetate in Hexanes) afforded pure compound **4** (oil, *ca*. 2 mg) and 10 mg of pure compound **5** as a sticky oil.

The side product was assigned to be methyl 4-acetylbenzoate based on GCMS analysis and 1H NMR spectroscopy.

*Product* **4b**

**1H NMR** (400 mHz, CD3­CN): 2.86-2.91 (1H, dd,  *J* = 5.9 Hz, *J* = 15.7 Hz), 3.29-3.25 (1H, dd,  *J* = 5.9 Hz, *J* = 15.7 Hz), 3.36-3.43 (3H, m), 3.89 (3H, s), 4.34 (1H, dd, *J* = 6.1 Hz, *J* = 8.3 Hz), 4.42 (2H, s), 4.74 (2H, dd,  *J* = 11.3 Hz, *J* = 15.7 Hz), 6.09 (1H, d, *J* = 6.1 Hz) 7.20-7.29 (10 H, m), 7.94 (2H, d, *J* = 8.6 Hz), 8.01 (d, 2H, *J* = 8.6 Hz).

**13C** **NMR** (100 mHz, CD3CN)  200.06, 166.94, 146.81, 141.52, 139.52, 134.51, 130.33, 129.23, 129.14, 129.08, 128.73, 128.42, 128.30, 107.59, 74.37, 73.82, 73.28, 52.95, 42.56, 33.33

**LRMS** (ESI) m/z (M++ 23Na): 467

**HRMS** (ESI) m/z (M++ 23Na): Calculated mass for C28H28O523Na = 467.1834, found 467.1847

*Product* **5b**

**1H NMR** (400 mHz, CD3­CN)  2.93-2.98 (2H, m), 3.18-3.21 (1H, m), 3.40-3.44 (2H, m), 3.89 (3H, s), 4.39 (2H, s), 4.64 (2H, s), 4.75-4.80 (1H, dd, *J* = 8.3 Hz, *J* = 12.4 Hz), 6.39 (1H, d, *J* = 12.4 Hz), 7.20-7.29 (10 H, m), 7.96 (2H, d, *J* = 8.6 Hz), 8.05 (d, 2H, *J* = 8.6 Hz).

**13C** **NMR** (100 mHz, CD3CN)  200.14, 167.02, 148.47, 141.52, 139.90, 138.35, 134.60, 130.47, 129.31, 129.16, 129.04, 128.69, 128.51, 128.32, 105.85, 74.88, 73.47, 71.93, 53.02, 42.78, 36.41

**IR**: 2923, 1724, 1687, 1279, 737, 698 cm -1

**LRMS** (CI + NH3) m/z (M++ 1): 445, 337, 247

**HRMS** (CI + NH3) m/z (M++1): Calculated mass for C28H29O5 = 445.20150, found 445.20159.

**Anal. Calcd.**: C, 75.65; H, 6.35 Found: C, 75.42; H, 6.32

### S.3 Low temperature analytical solid state photolyses

The solid material (2-5 mg) was sandwiched between two microscope slides. The plates were fixed to one another with tape, and the assembly heat-sealed in a poly(ethylene) bag under nitrogen. A low temperature ethanol bath contained in an unsilvered Dewar vessel (Pyrex) was maintained at the temperature indicated by means of a Cryocool CC-100 II Immersion Cooling System (Neslab Instrument Inc.). Samples sealed in poly(ethylene) bags were suspended in the cold liquid and irradiated through the transparent walls of the Dewar vessel. Irradiations were performed using a 450 W Hanovia medium-pressure mercury lamp in a water-cooled immersion well. Following irradiation, the sample was quantitatively washed from the plates with methanol, and concentrated *in vacuo*. Salts **1c-h** were treated with diazomethane, and subsequent analysis based on the corresponding methyl ester **4b** and **5b**.

**S.4 MM+ molecular mechanics calculations for the lowest energy conformation of ester 1b**


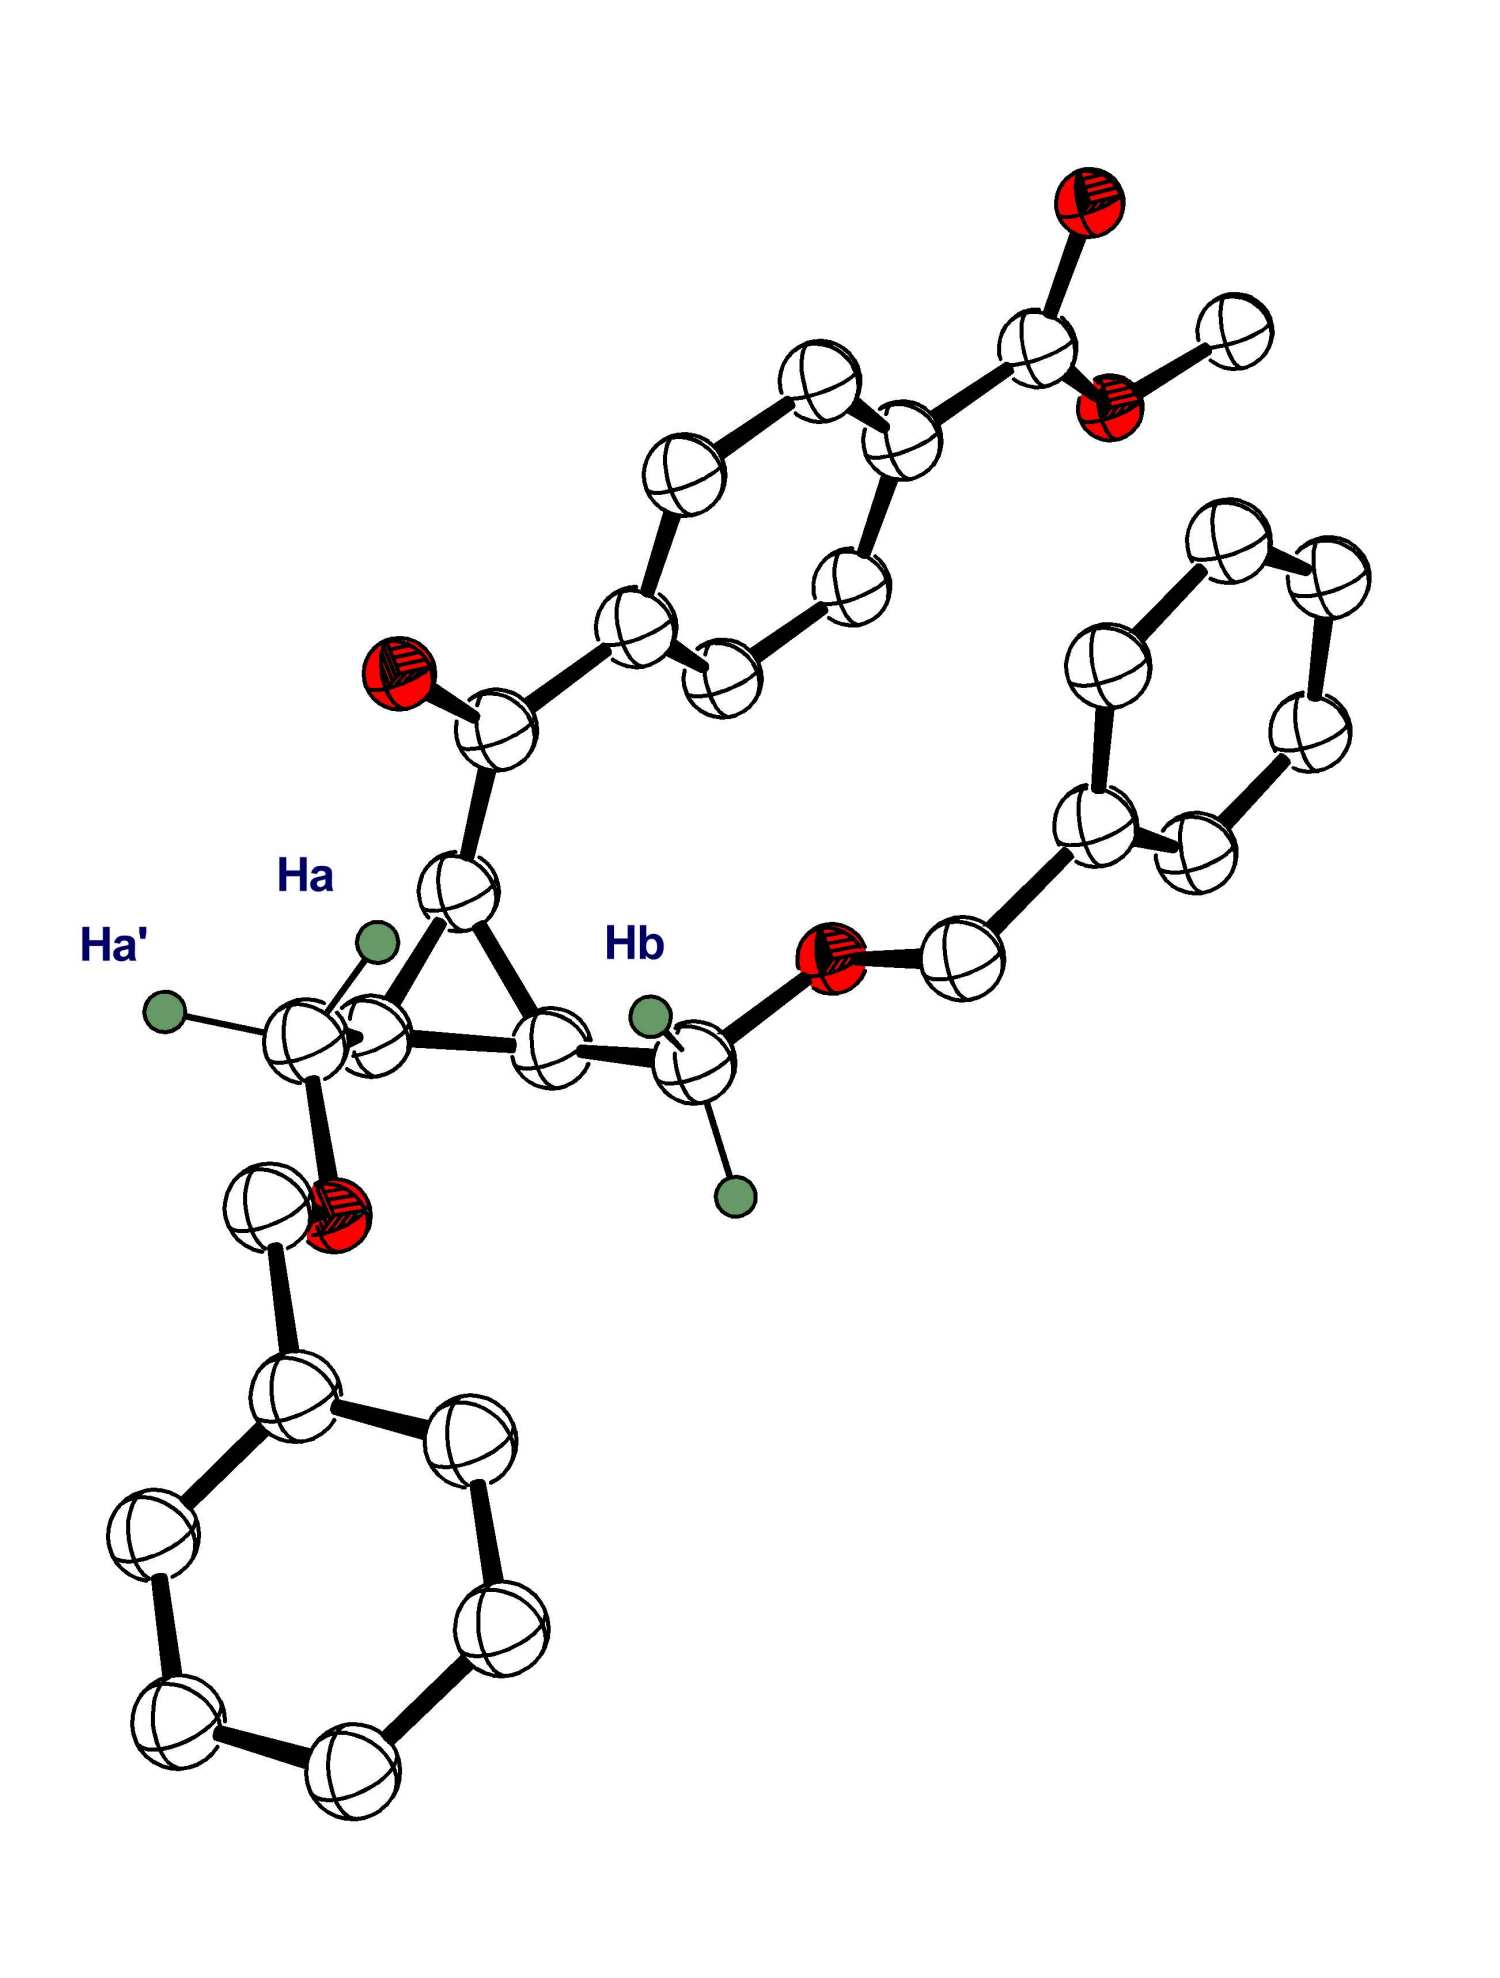
The lowest energy conformation of ester **1b** predicted from molecular mechanics calculations indicates that Ha is closer to the carbonyl oxygen than Hb (Figure S1). Similar to the solid state conformation of ester **1b**, abstraction of Ha in conformer **I** would lead to the formation of the pre-*cis* biradical while abstraction of the Hb would lead to the pre-*trans* biradical.

**conformer I**

**Figure S1** Conformer **I**: the lowest energy conformation of ester **1b** calculated by MM+.

**S.5** **Separation of enantiomers of compounds 4b and 5b**

Enantiomeric excesses of ester **4b** and **5b** were determined by HPLC on a Chiralcel OD column; the mobile phase was hexane/ethanol (95:5), and the flow rate was 1.0 mL/min; the monitoring wavelength was 254 nm.


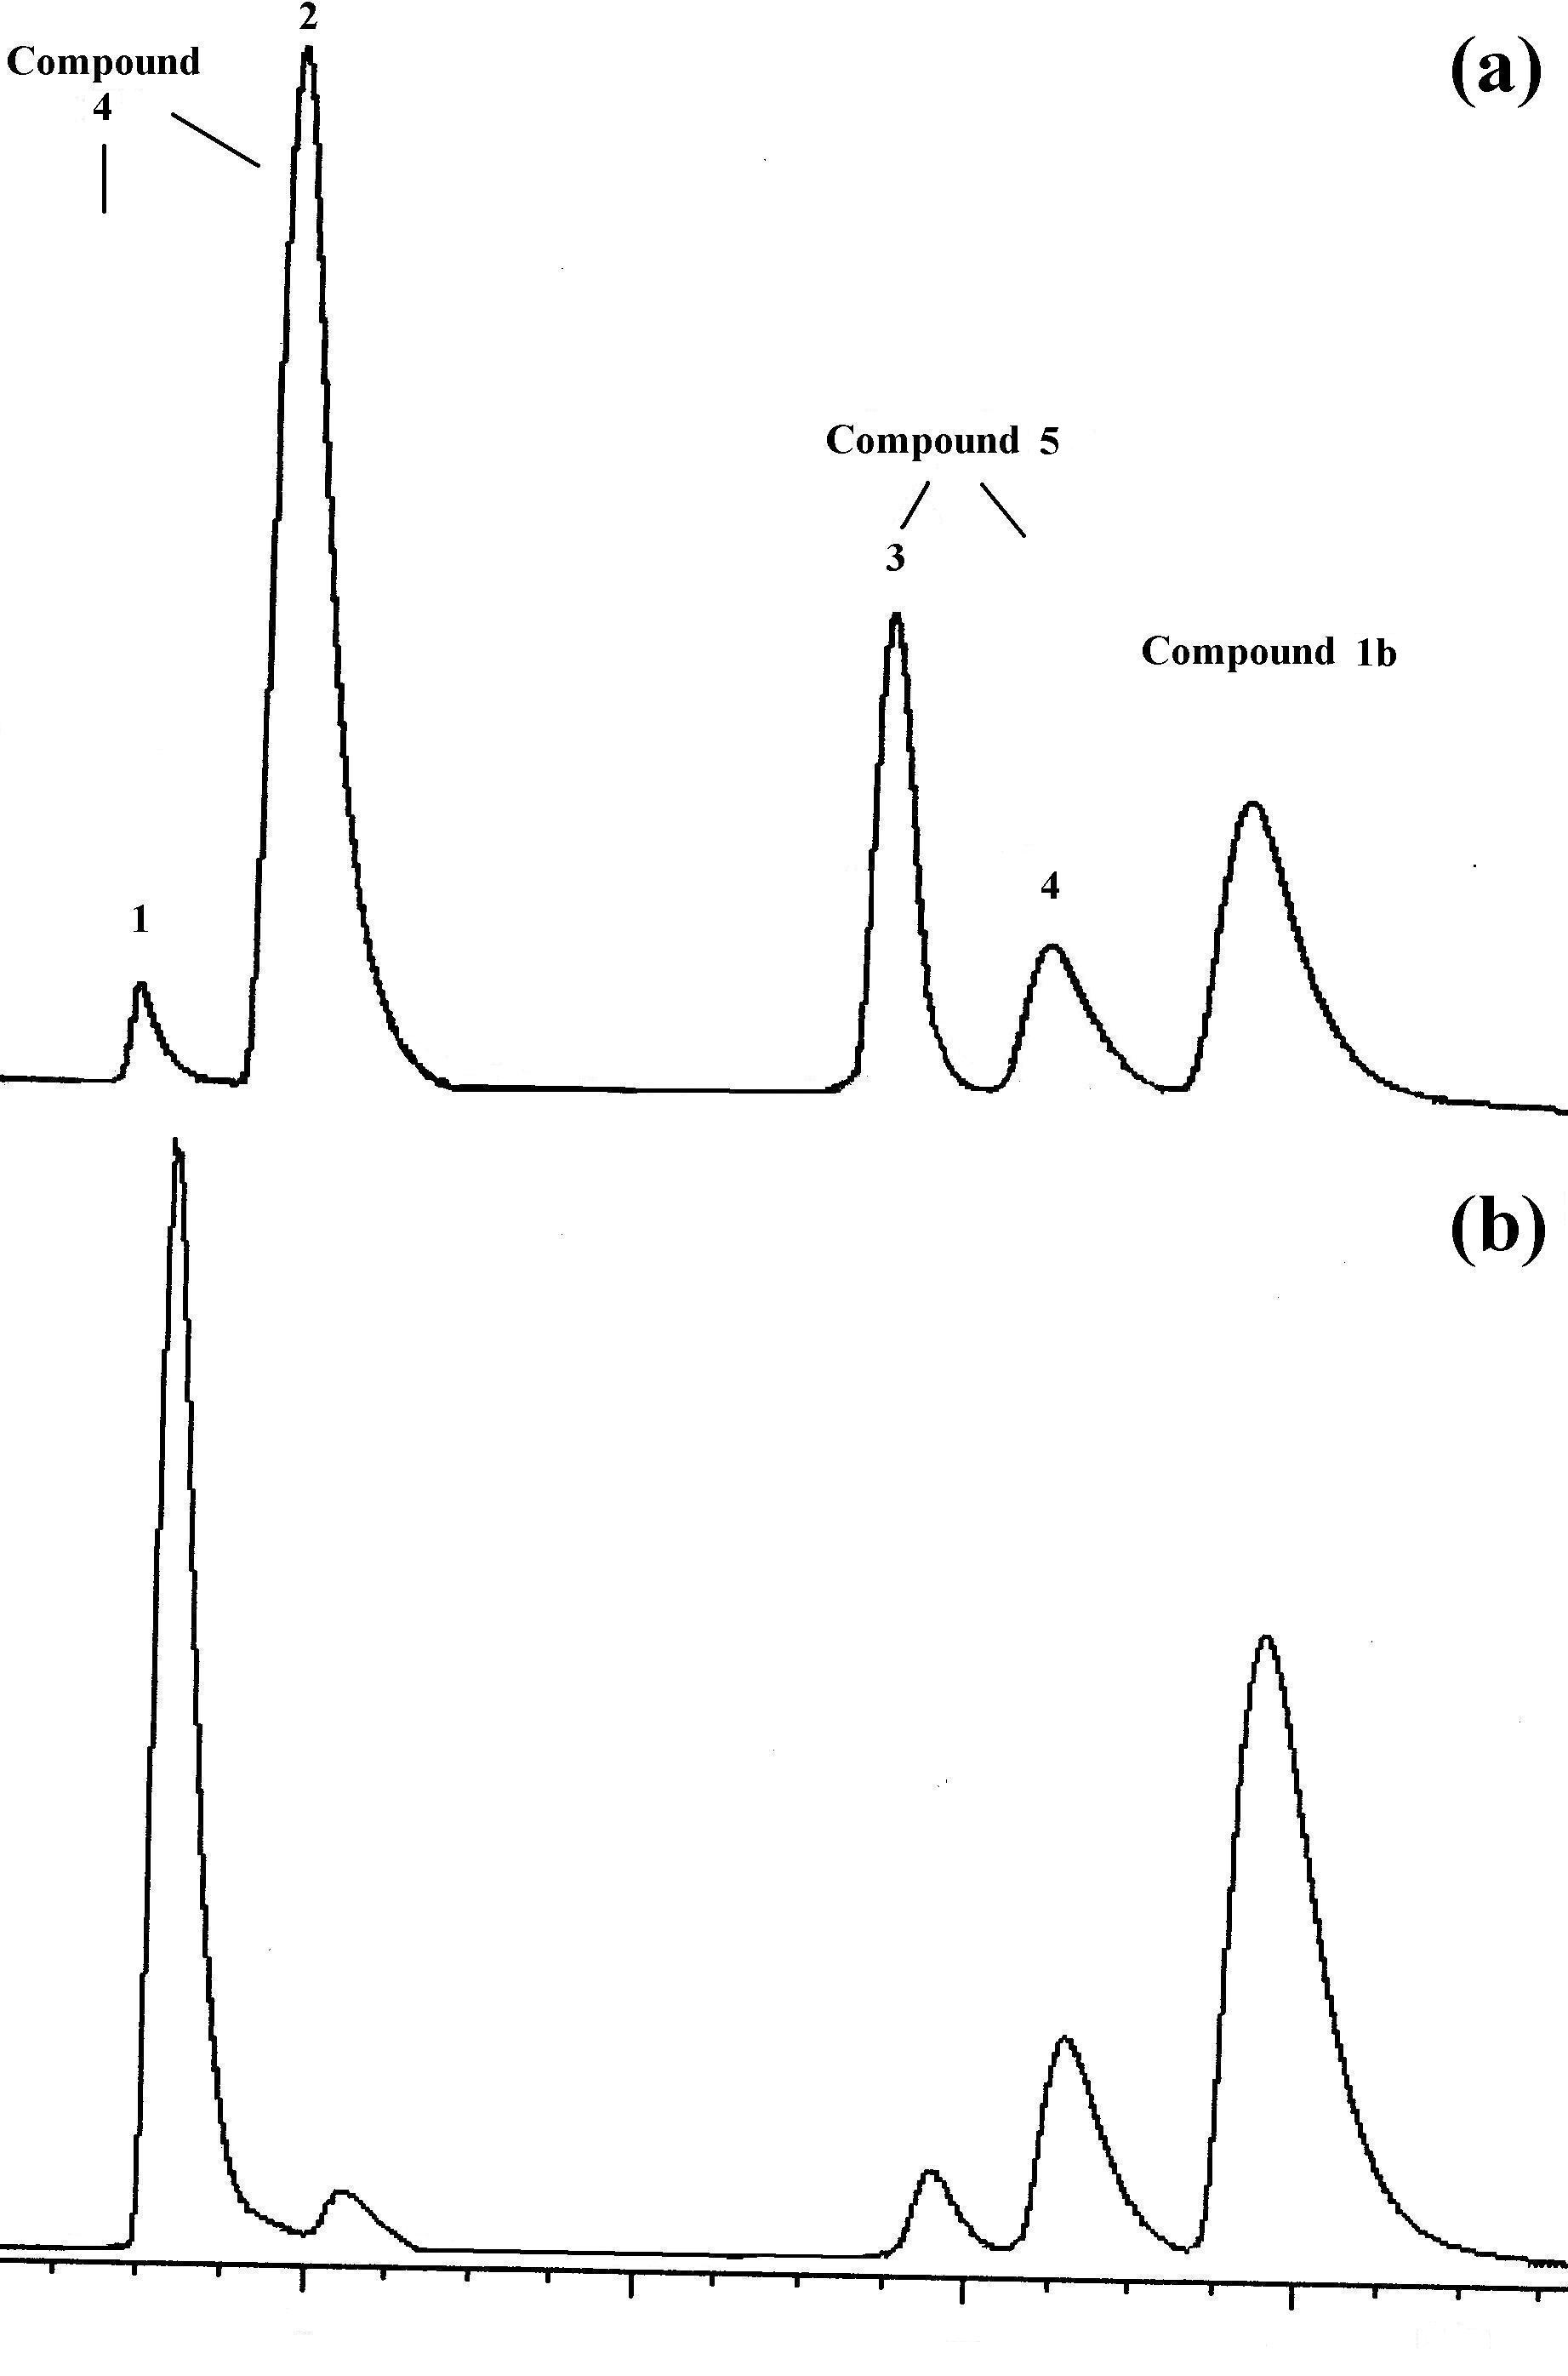


**Figure S2** HPLC separation of enantiomers of photoproducts **4** and **5**. Peaks 1 and 2 represent the enantiomers of **4** while peaks **3** and **4** represent the enantiomers of product **5**. (a) HPLC trace of the crystalline state photolysis of salt **1f**. (b) HPLC trace of the crystalline state photolysis of salt **1g**.

1. A.B. Charette, J.-F. Fournier, unpublished results. [↑](#footnote-ref-2)
2. A.B. Charette, A. Gagnon, J.-F. Fournier, *J. Am. Chem. Soc.*, 2002, **124**, 386. [↑](#footnote-ref-3)
